# Supplementary material
Source: HighWire-hosted journal article supplement (https://genome.cshlp.org/content/suppl/2003/07/09/13.8.1800)

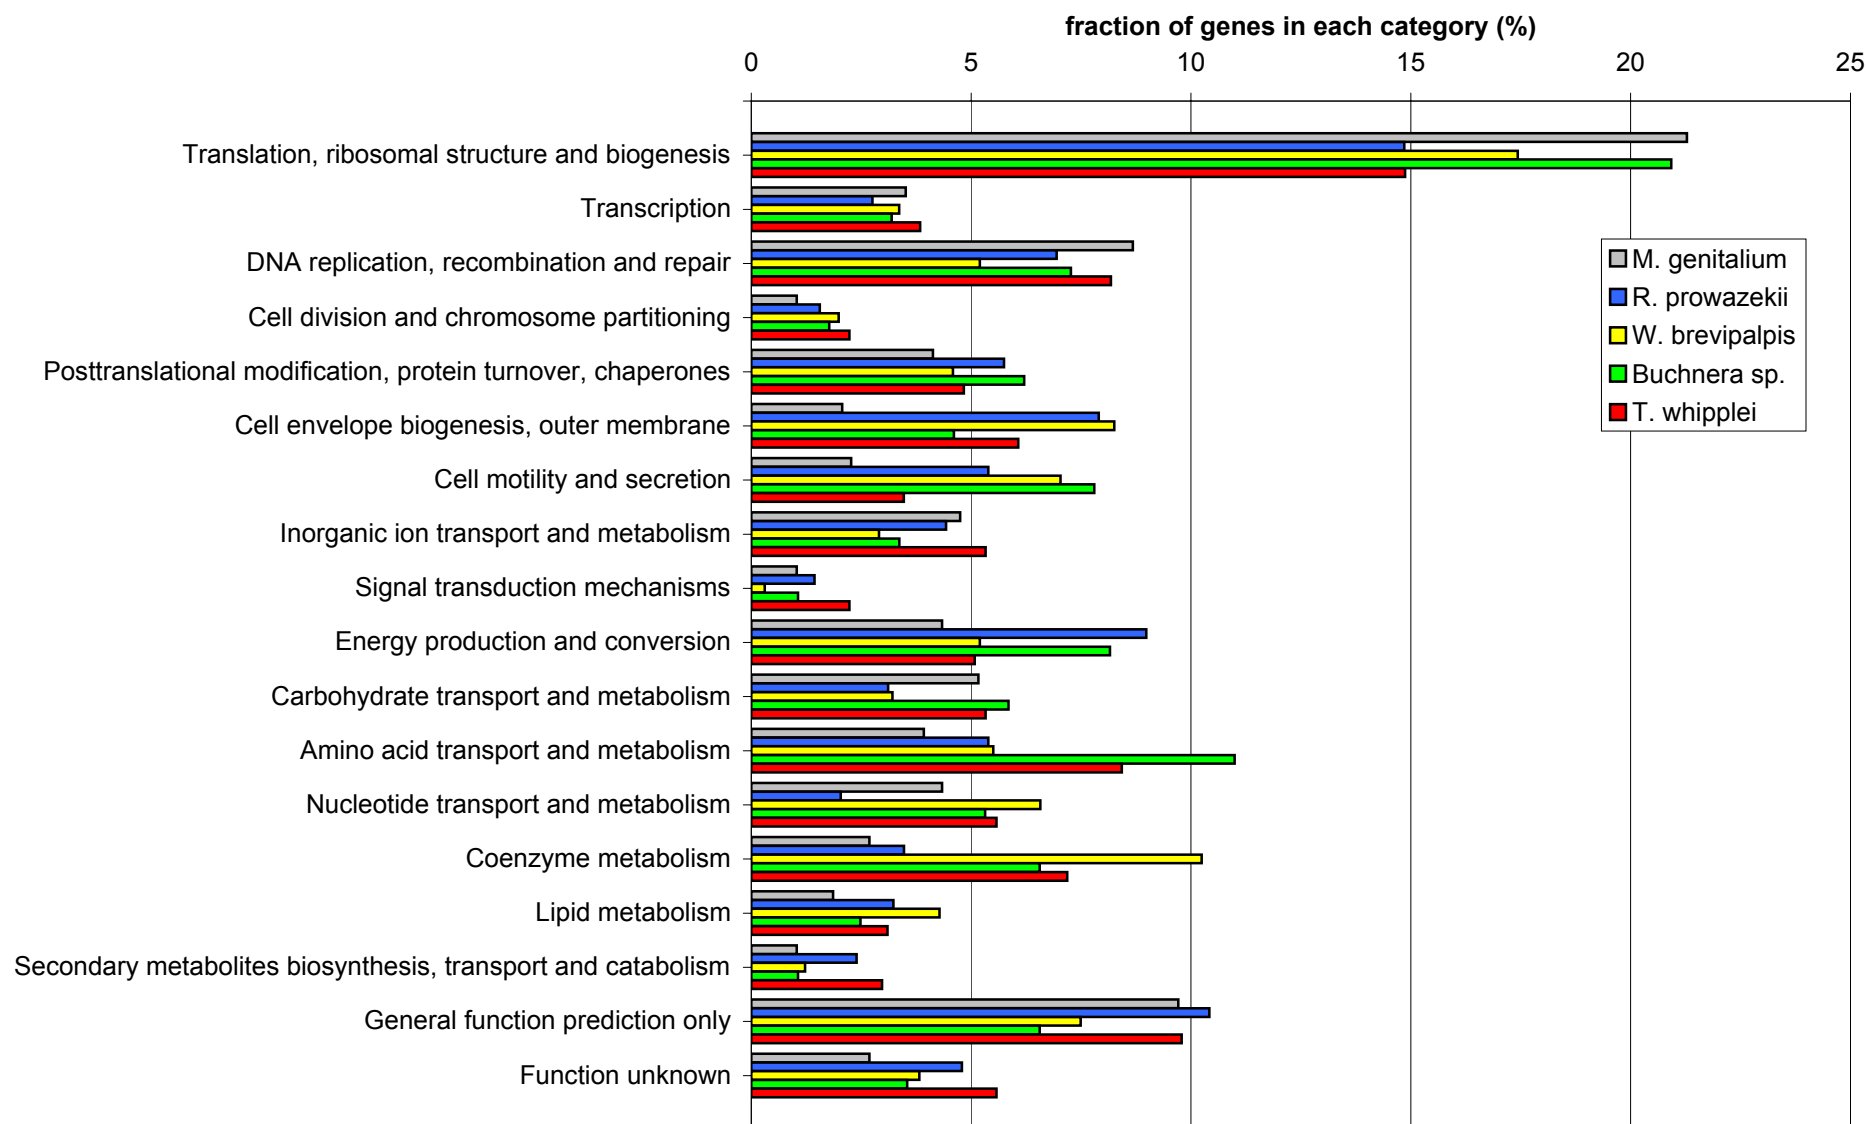

Fig. S2

Supplement: Fig_S2.pdf [file Fig_S2.pdf]
